# Supplementary material for: Transcriptomic analysis reveals specific osmoregulatory adaptive responses in gill mitochondria-rich cells and pavement cells of the Japanese eel
Source: PubMed Central journal article supplement (PMC4683740; doi:10.1186/s12864-015-2271-0), 2015-12-18
Supplement: 12864_2015_2271_MOESM9_ESM.pdf [file 12864_2015_2271_MOESM9_ESM.pdf]

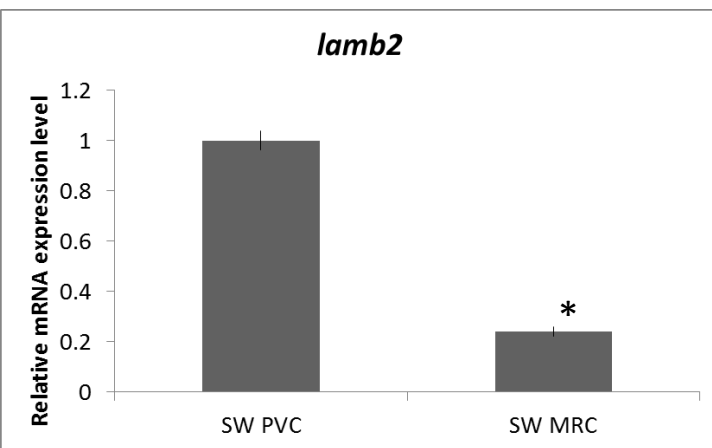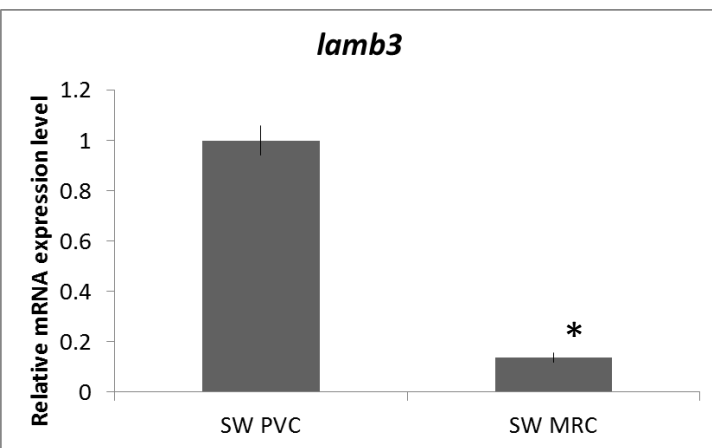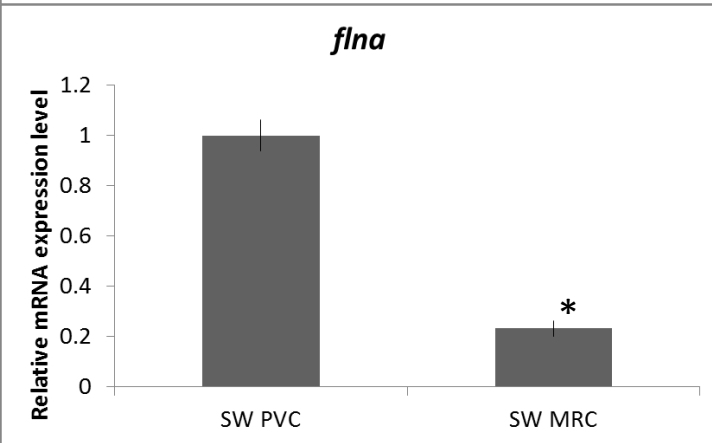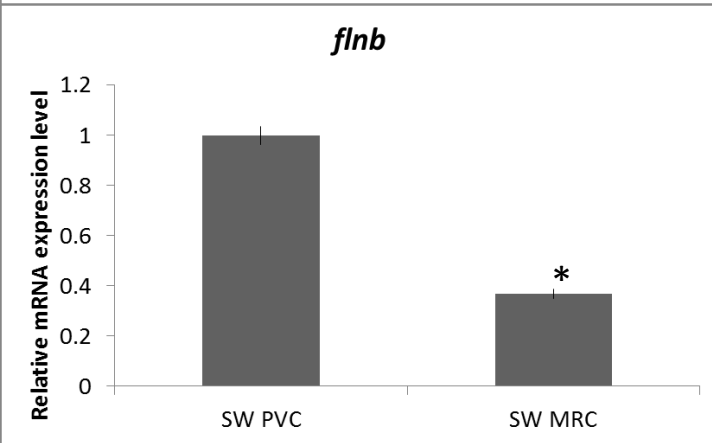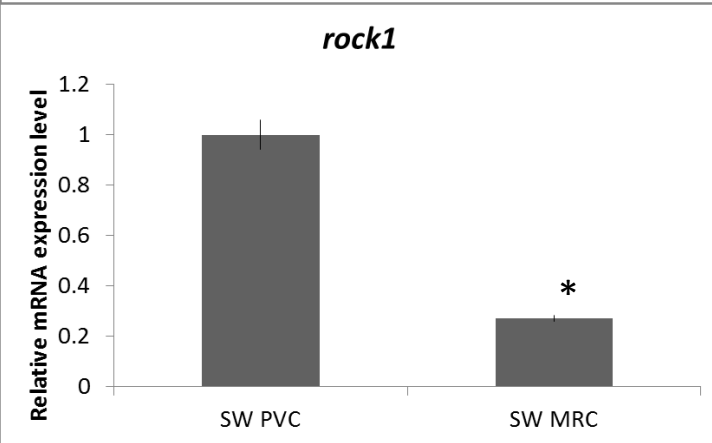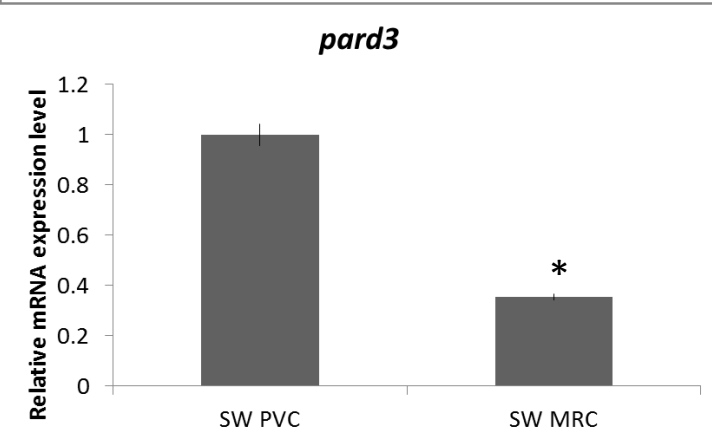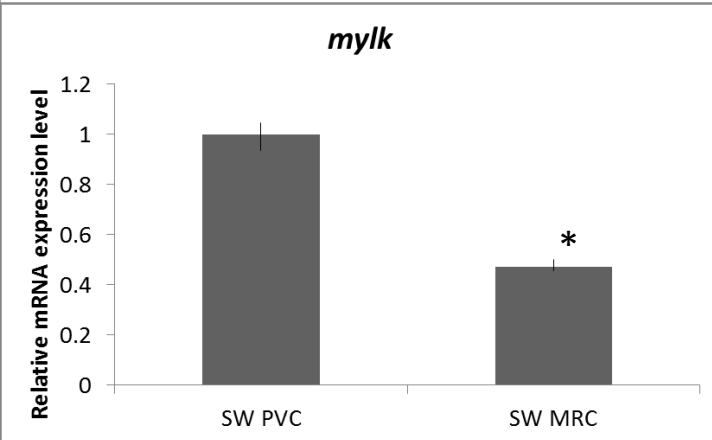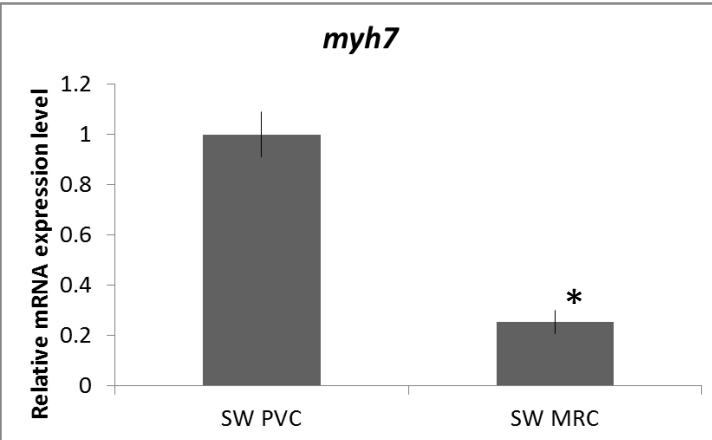

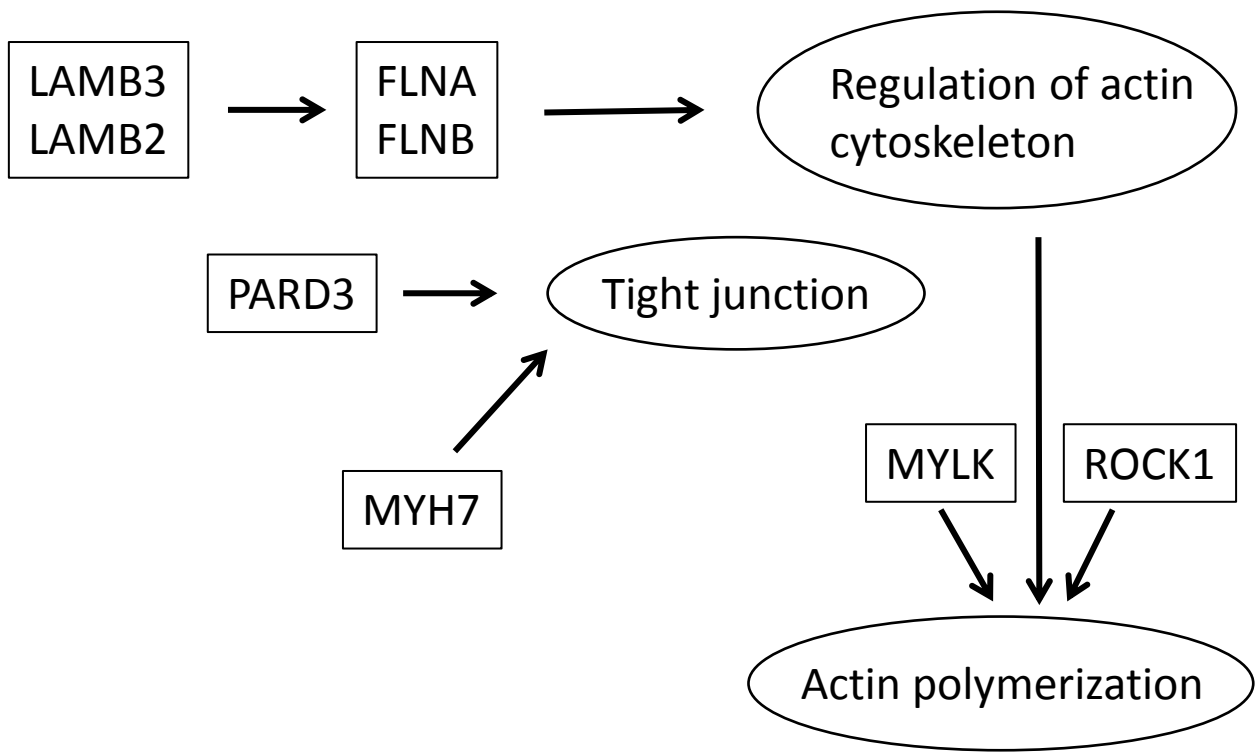

Real-time PCR of selected SW PVC highly expressed transcripts that contributed in tight junction and cytoskeleton regulation. Focal adhesion transcripts such as laminin beta 2 (*lamb2*), laminin beta 3 (*lamb3*), filamin A (*flna*), filamin B (*flnb*), rho-associated protein kinase 1 (*rock1*) and myosin light chain kinase (*mylk*), could stimulate the reorganization of actin cytoskeleton and regulate actin polymerization. Adherens junction transcripts such as par-3 family cell polarity regulator (*pard3*) and myosin 7 (*myh7*) will regulate the tight junction.
