# Supplementary material for: Transcriptomic analysis reveals specific osmoregulatory adaptive responses in gill mitochondria-rich cells and pavement cells of the Japanese eel
Source: PubMed Central journal article supplement (PMC4683740; doi:10.1186/s12864-015-2271-0), 2015-12-18

# PVC biological functions

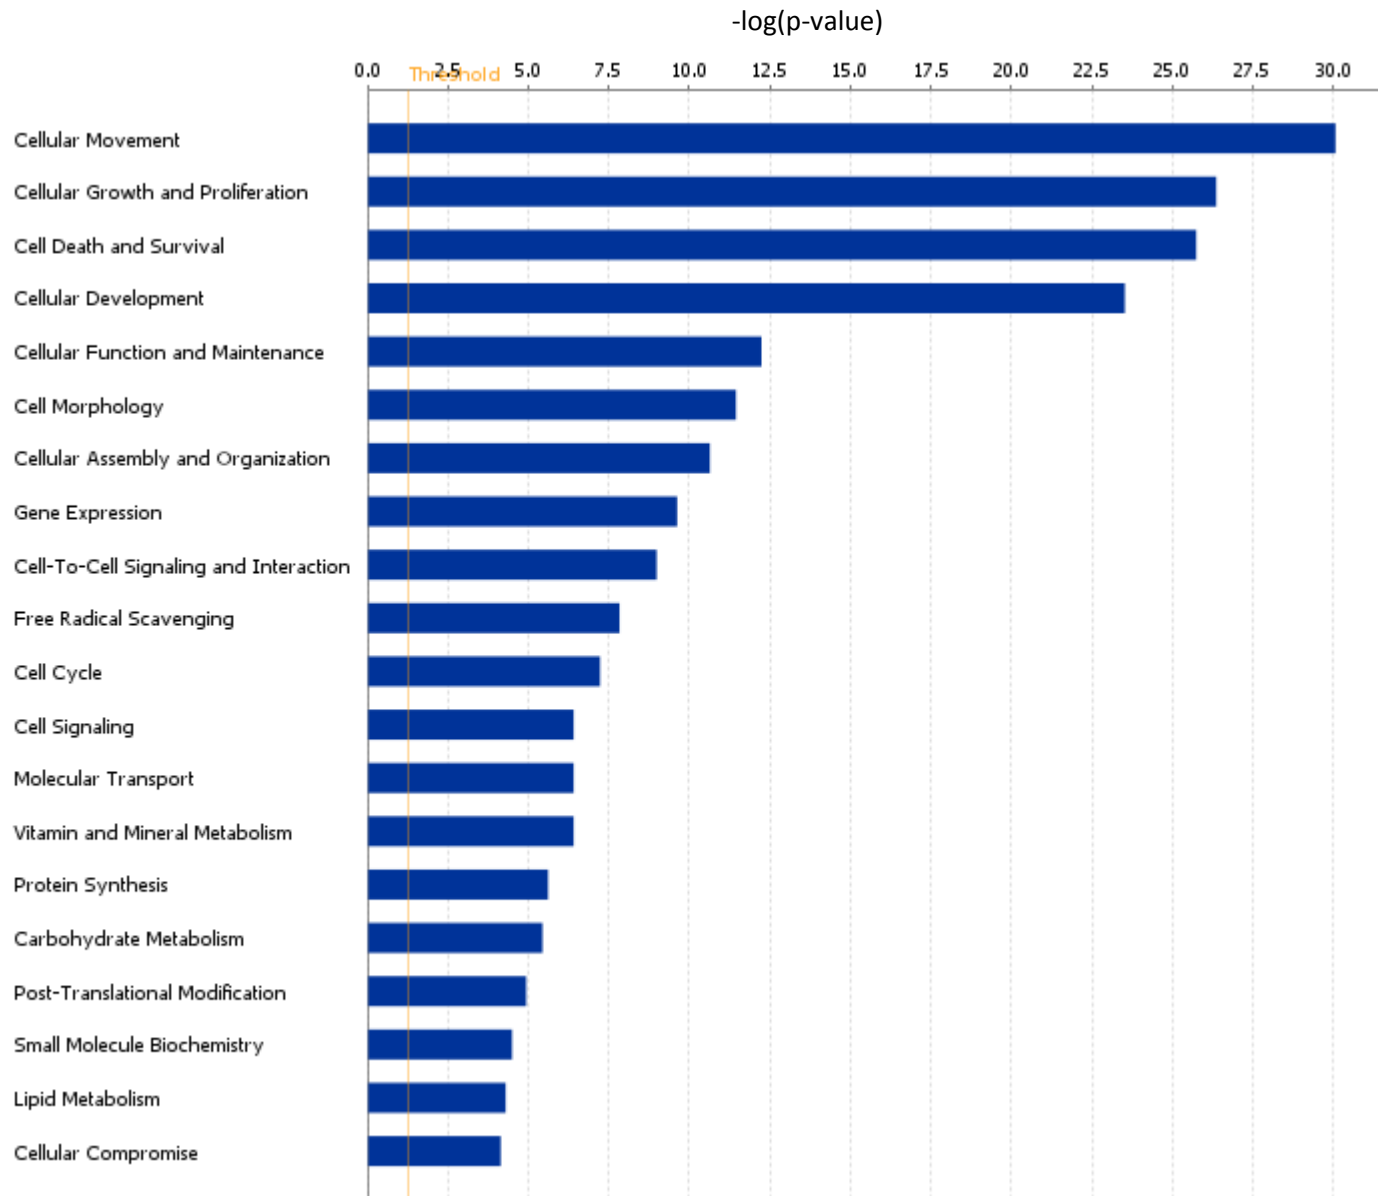

# PVC signaling pathways

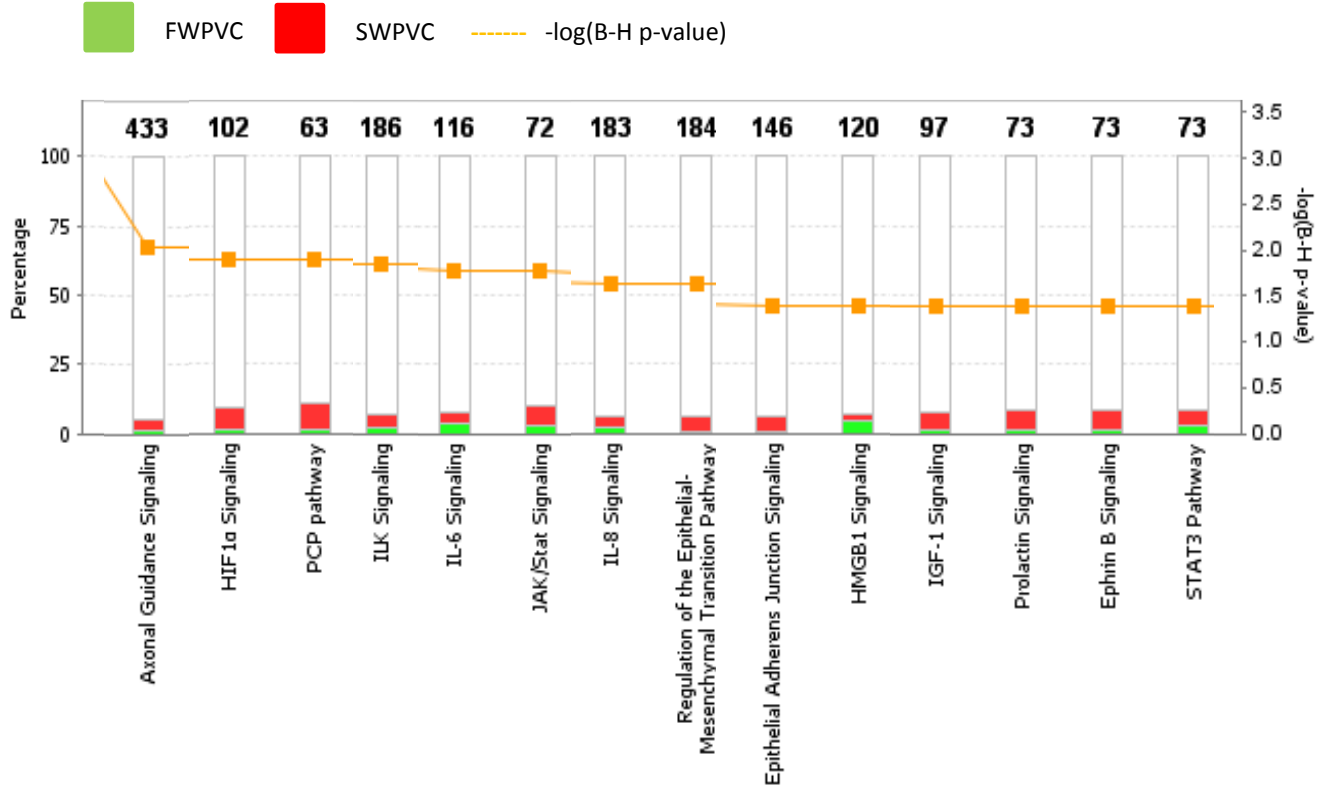

433 102 63 186 116 72 183 184 146 120 97 73 73 73

Percentage

$-\log(\text{B-H p-value})$

# MRC biological functions

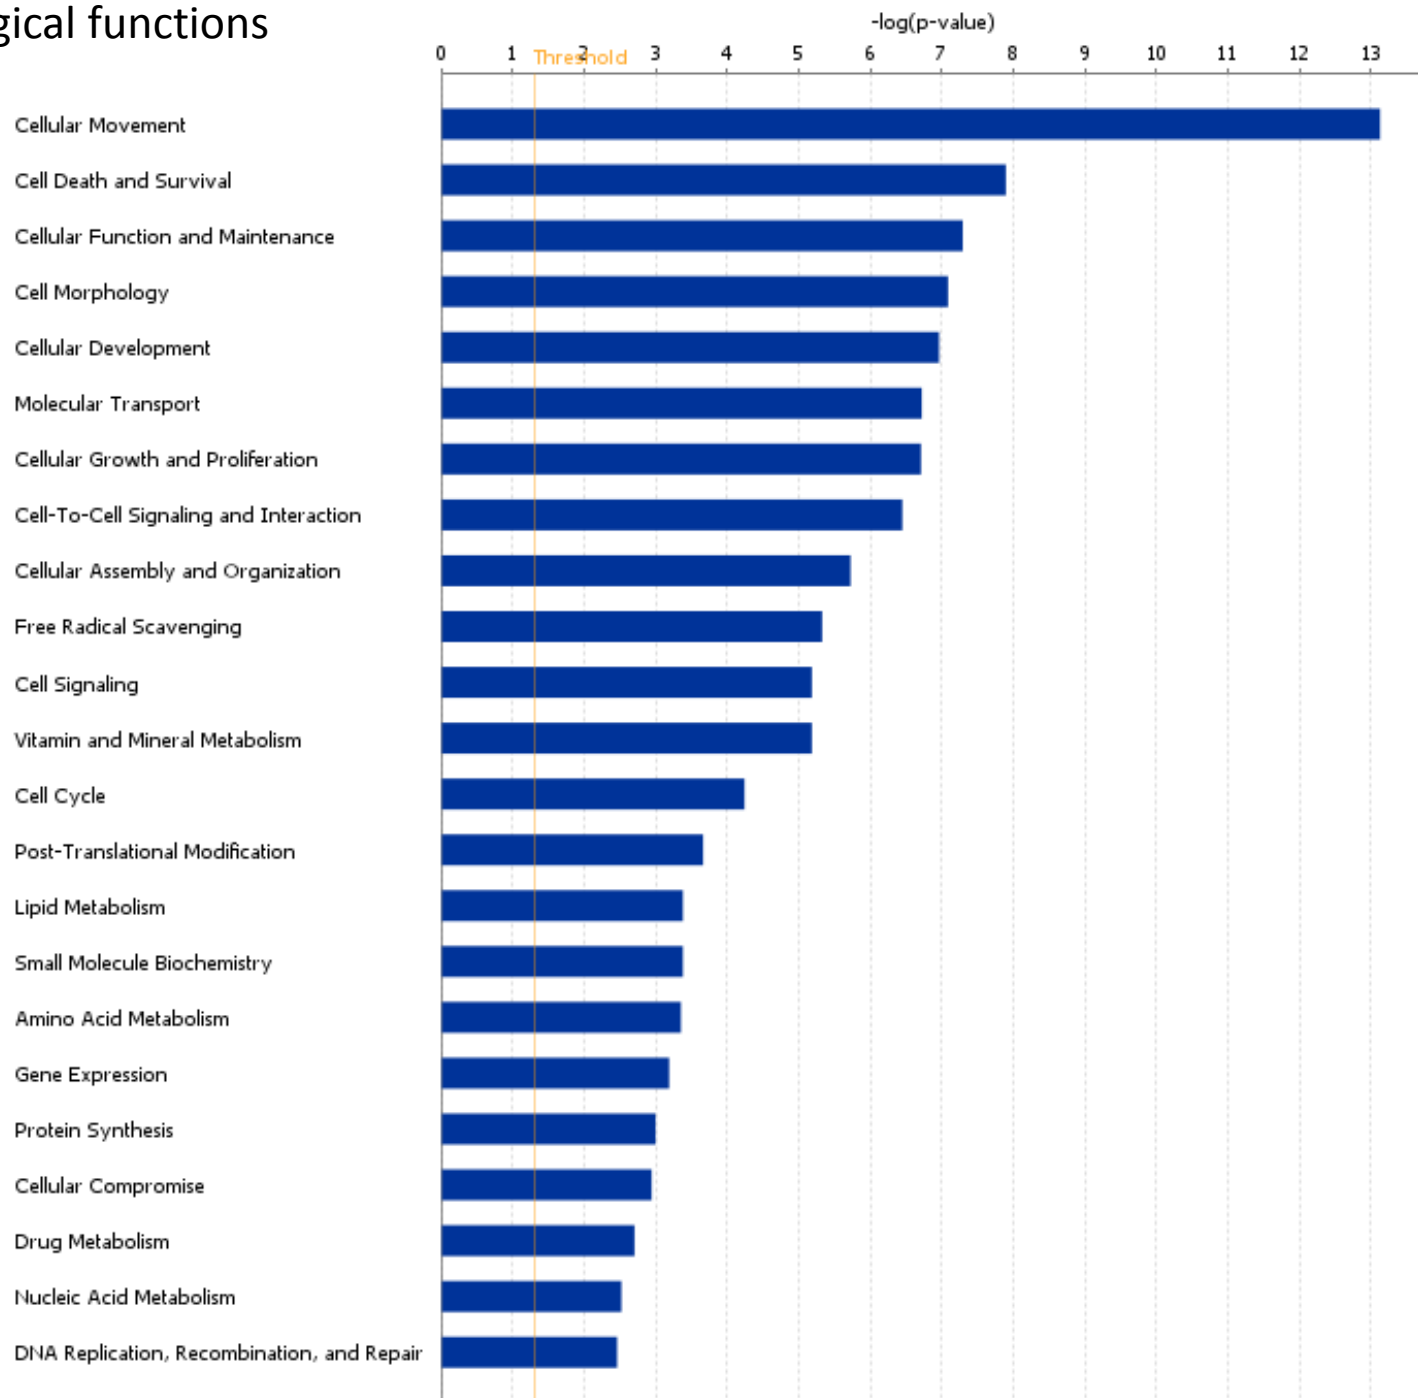

# MRC signaling pathways

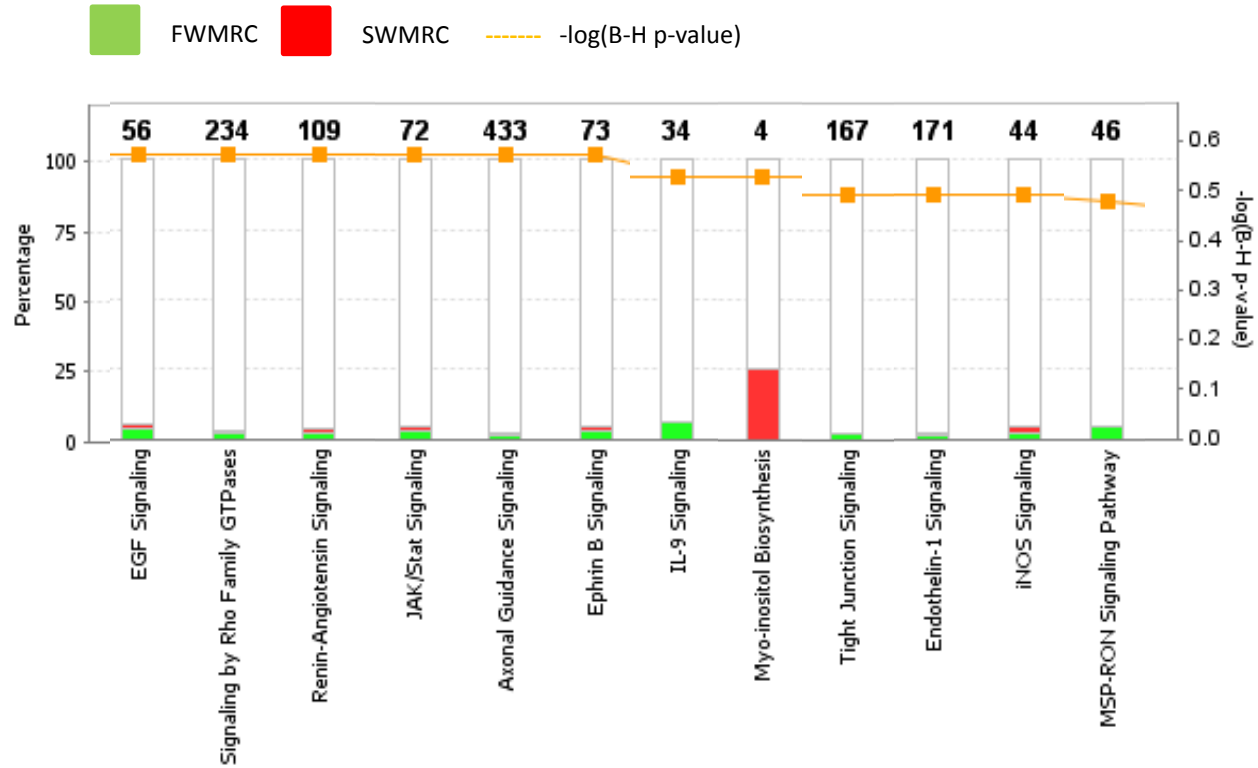

Supplement: 12864_2015_2271_MOESM10_ESM.pdf [file 12864_2015_2271_MOESM10_ESM.pdf]
